# Supplementary material for: Isolation and Characterization of Novel Yeasts From Dairy Cattle Rumen for Potential Use as Feed Additives&nbsp;
Source: Research Square preprint supplement (doi:10.21203/rs.3.rs-107015/v1), 2020-11-24
Supplement: Supplementary file 1 [file 0f86451ca609ceb0ee6cfcfc.docx]

| Code name | Picture | Appearance | Elevation | Colony nature | Colony color |
| --- | --- | --- | --- | --- | --- |
| A-KKU20 | 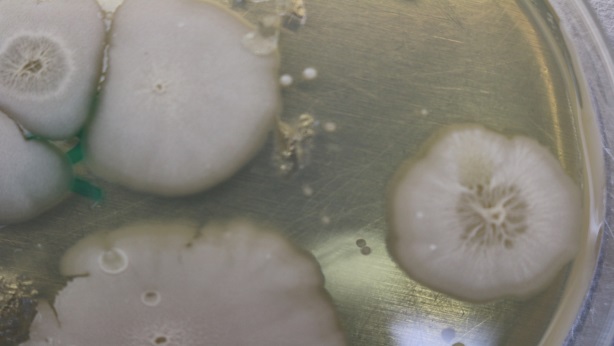 | Asymmetrical | Raised | Rough | White |
| B-KKU20 | 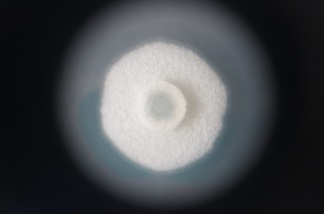 | Asymmetrical | Raised | Rough | White |
| C-KKU20 | 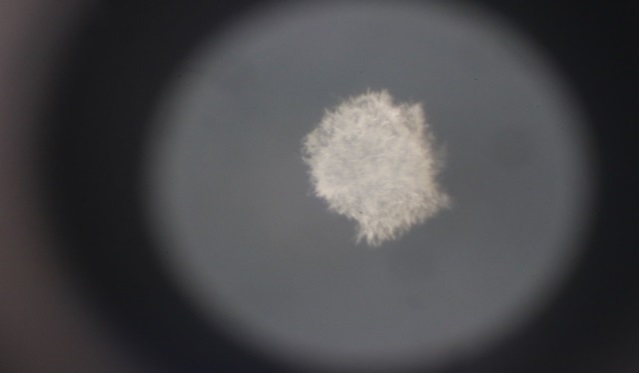 | Asymmetrical | Flat | Rough | White |
| D-KKU20 | 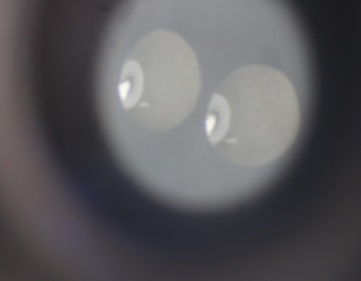 | Ovoid | Flat | Smooth and shiny | colorless |
| E-KKU20 | 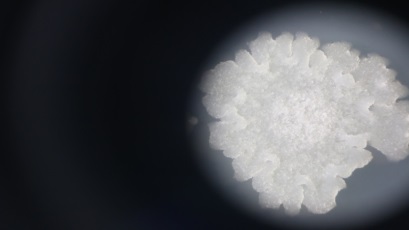 | Asymmetrical | Flat | Rough | White |
| F-KKU20 | 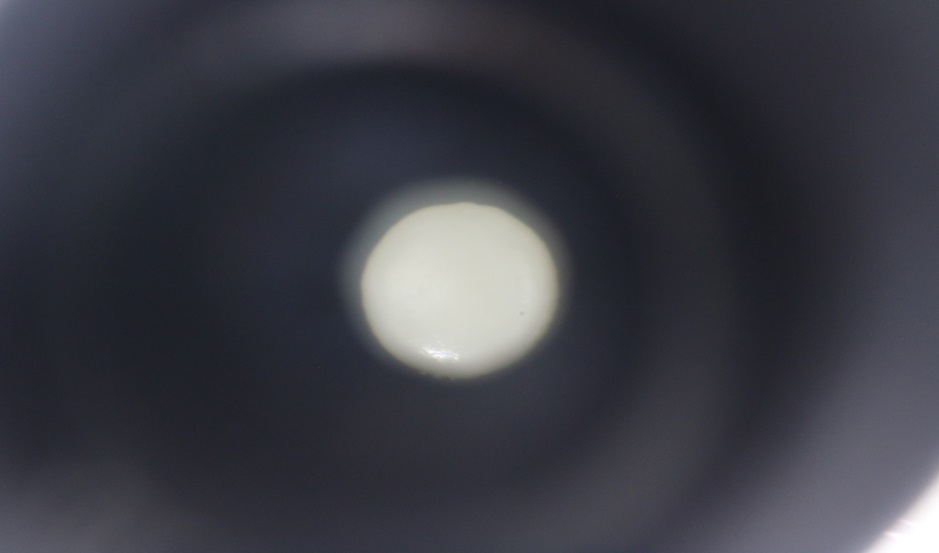 | Ovoid | Convex | Smooth | White |
| G-KKU20 | 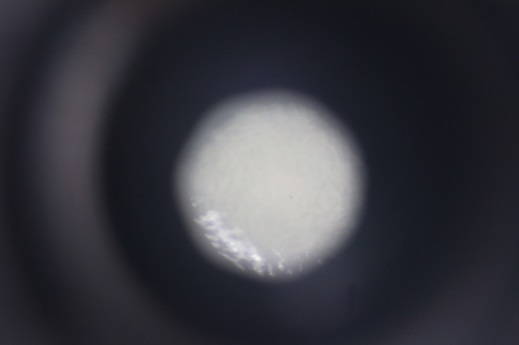 | Ovoid | Convex | Rough | Turbid |
| H-KKU20 | 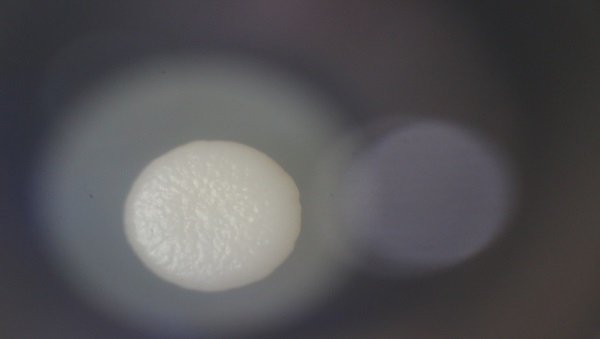 | Ovoid | Convex | Rough | White |
| I-KKU20 | 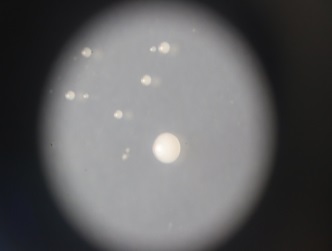 | Ovoid | Flat | Smooth | White |
| J-KKU20 | 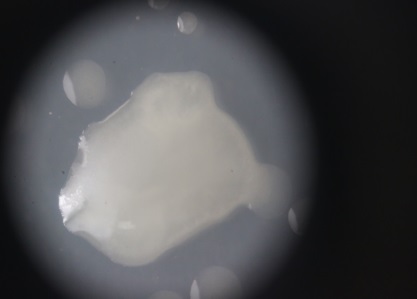 | Asymmetrical | Flat | Smooth | Colorless |
| K-KKU20 | 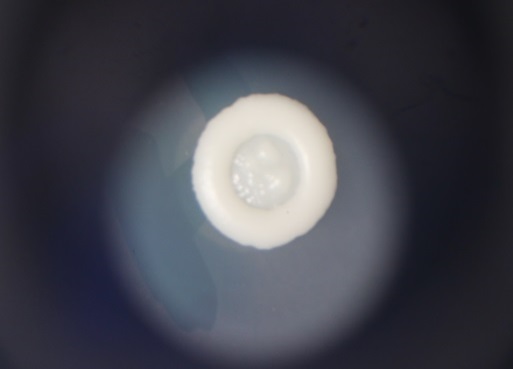 | Ovoid | Convex | Rough | White |

Table 1. Colonies morphology of ruminal yeast strains of Thai-Holstein-Friesian

| Isolates | Gene bank Accession No. | Nearest Species with Accession No. | Nucleotide Identity (%) | No. of Nucleotide Differences |
| --- | --- | --- | --- | --- |
| H-KKU20 | MH545928 | *Pichia kudriavzevii* | 572/572 (100) | 0 |
| I-KKU20 | U45749 | *Candida tropicalis* | 570/570 100 | 0 |
| C-KKU20 | EU651849 | *Galactomyce* spp*.* | 552/553 (99.82) | 1 |

Table 2. Identification of isolated yeast from rumen fluids
